# Supplementary material
Source: Springer Nature journal article supplement (https://www.springermedizin.de/resource/supplementary/12970_2010_177_MOESM2_ESM.pdf/9594522)

Squat Jump (W)

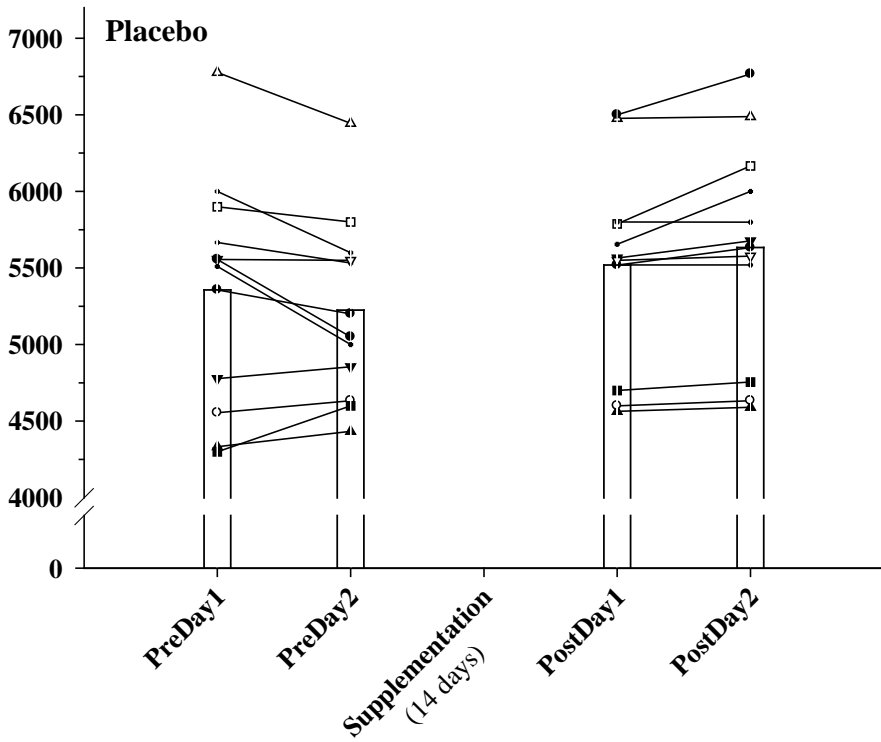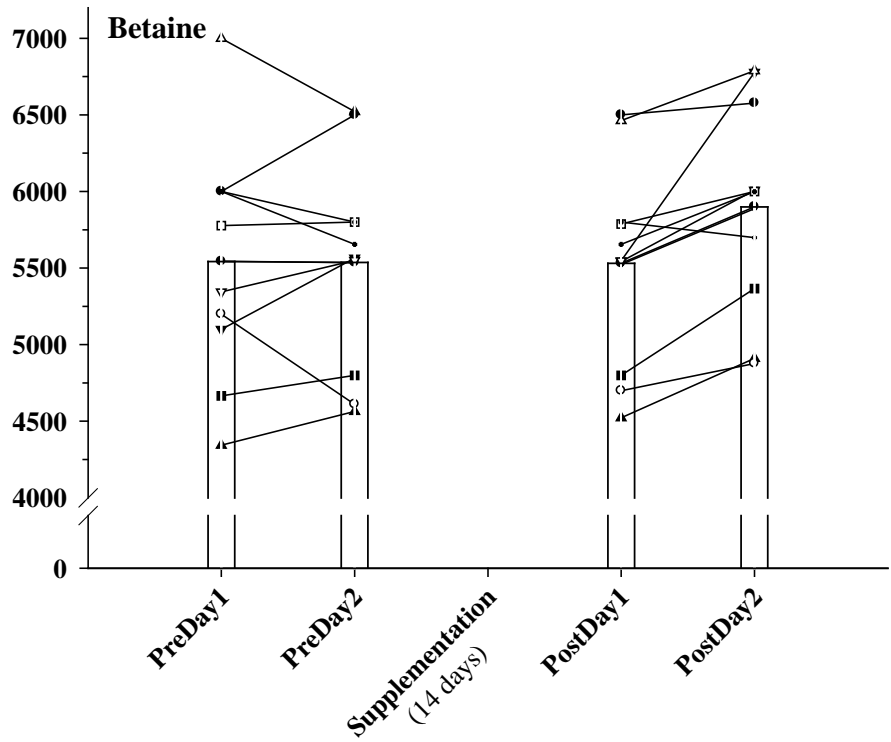

Supplement: MOESM2 [file 9594522]
